# Supplementary material
Source: PubMed Central journal article supplement (PMC5507745)
Supplement: NIHMS864954-supplement-supplement_1.pdf [file NIHMS864954-supplement-supplement_1.pdf]

| Description                                                | ICD-9-CM Code  |
|------------------------------------------------------------|----------------|
| <b>Diagnosis codes for Cohort Selection</b>                |                |
| Spine fracture without spinal cord injury                  | 805.0x; 805.1x |
| Cervical spinal cord injury, closed                        | 806.0x         |
| Cervical spinal cord injury, open                          | 806.1x         |
| Thoracic spinal cord injury, closed                        | 806.2x         |
| Thoracic spinal cord injury, open                          | 806.3x         |
| Lumbar spinal cord injury, closed                          | 806.4          |
| Lumbar spinal cord injury, open                            | 806.5          |
| Sacral spinal cord injury, closed                          | 806.6x         |
| Sacral spinal cord injury, open                            | 806.7x         |
| Vertebral fracture with spinal cord injury<br>NOS , closed | 806.8          |
| Vertebral fracture with spinal cord injury<br>NOS, open    | 806.9          |
| Cervical spinal cord injury NOS                            | 952.0x         |
| Thoracic spinal cord injury NOS                            | 952.1x         |
| Lumbar spinal cord injury NOS                              | 952.x2         |
| Sacral spinal cord injury NOS                              | 952.x3         |
| Cauda equina injury                                        | 952.x4         |

|                                    |                                                                                                                                                                                                                                                                                                                                                                                                                                                                                                                                                                                              |
|------------------------------------|----------------------------------------------------------------------------------------------------------------------------------------------------------------------------------------------------------------------------------------------------------------------------------------------------------------------------------------------------------------------------------------------------------------------------------------------------------------------------------------------------------------------------------------------------------------------------------------------|
| Multiple sites, spinal cord injury | 952.x8                                                                                                                                                                                                                                                                                                                                                                                                                                                                                                                                                                                       |
| Spinal cord injury, NOS            | 952.x9                                                                                                                                                                                                                                                                                                                                                                                                                                                                                                                                                                                       |
| <b>Procedure</b>                   |                                                                                                                                                                                                                                                                                                                                                                                                                                                                                                                                                                                              |
| Repair of vertebral fracture       | 03.53                                                                                                                                                                                                                                                                                                                                                                                                                                                                                                                                                                                        |
| Spinal fusion                      | 81.00-.08                                                                                                                                                                                                                                                                                                                                                                                                                                                                                                                                                                                    |
| Refusion of spine                  | 81.30-.39                                                                                                                                                                                                                                                                                                                                                                                                                                                                                                                                                                                    |
| Number of vertebral levels fused   | 81.62-.64                                                                                                                                                                                                                                                                                                                                                                                                                                                                                                                                                                                    |
| <b>Mechanism</b>                   |                                                                                                                                                                                                                                                                                                                                                                                                                                                                                                                                                                                              |
| Cut                                | E9200, E9201, E9202, E9203, E9204, E9205, E9208, E9209, E966, E974, E986                                                                                                                                                                                                                                                                                                                                                                                                                                                                                                                     |
| Gunshot Wound                      | E9220, E9221, E9222, E9223, E9228, E9229, E9287, E9650, E9651, E9652, E9653, E9654, E970, E9794, E9850, E9851, E9852, E9853, E9854                                                                                                                                                                                                                                                                                                                                                                                                                                                           |
| Machine                            | E9190, E9191, E9192, E9193, E9194, E9195, E9196, E9197, E9198, E9199                                                                                                                                                                                                                                                                                                                                                                                                                                                                                                                         |
| Motor Vehicle Accident             | E8100, E8101, E8102, E8103, E8104, E8105, E8108, E8109, E8110, E8111, E8112, E8113, E8114, E8115, E8118, E8119, E8120, E8121, E8122, E8123, E8124, E8125, E8128, E8129, E8130, E8131, E8132, E8133, E8134, E8135, E8138, E8139, E8140, E8141, E8142, E8143, E8144, E8145, E8148, E8149, E8150, E8151, E8152, E8153, E8154, E8155, E8158, E8159, E8160, E8161, E8162, E8163, E8164, E8165, E8168, E8169, E8170, E8171, E8172, E8173, E8174, E8175, E8178, E8179, E8180, E8181, E8182, E8183, E8184, E8185, E8188, E8189, E8190, E8191, E8192, E8193, E8194, E8195, E8198, E8199, E9685, E9885 |
| Natural Accident                   | E9000, E9001, E9009, E9010, E9011, E9018, E9019, E9020, E9021, E9022, E9028, E9029, E903, E9040, E9041, E9042, E9043, E9049, E9050, E9051, E9052, E9053, E9054, E9055, E9056, E9057, E9058, E9059, E9060, E9061, E9062, E9063, E9064, E9065, E9068, E9069,                                                                                                                                                                                                                                                                                                                                   |

---

E907, E908, E9080, E9081, E9082, E9083, E9084, E9088, E9089, E909, E9090, E9091,  
E9092, E9093, E9094, E9098, E9099, E9280, E9281, E9282, E9883

Pedestrian

E8003, E8013, E8023, E8033, E8043, E8053, E8063, E8073, E8206, E8216, E8226, E8236,  
E8246, E8256, E8261, E8269, E8271, E8281, E8291, E8106, E8116, E8126, E8136, E8146,  
E8156, E8166, E8176, E8186, E8196

Cyclist

E8002, E8012, E8022, E8032, E8042, E8052, E8062, E8072, E8207, E8217, E8227, E8237,  
E8247, E8257, E8260, E8270, E8280, E8290, E8107, E8117, E8127, E8137, E8147, E8157,  
E8167, E8177, E8187, E8197

Struck

E916, E9170, E9171, E9172, E9173, E9174, E9175, E9176, E9177, E9178, E9179, E9274,  
E9600, E9682, E973, E975

Non-MVC Transportation Accident

E8000, E8001, E8008, E8009, E8010, E8011, E8018, E8019, E8020, E8021, E8028, E8029,  
E8030, E8031, E8038, E8039, E8040, E8041, E8048, E8049, E8050, E8051, E8058, E8059,  
E8060, E8061, E8068, E8069, E8070, E8071, E8078, E8079, E8200, E8201, E8202, E8203,  
E8204, E8205, E8208, E8209, E8210, E8211, E8212, E8213, E8214, E8215, E8218, E8219,  
E8220, E8221, E8222, E8223, E8224, E8225, E8228, E8229, E8230, E8231, E8232, E8233,  
E8234, E8235, E8238, E8239, E8240, E8241, E8242, E8243, E8244, E8245, E8248, E8249,  
E8250, E8251, E8252, E8253, E8254, E8255, E8258, E8259, E8262, E8263, E8264, E8268,  
E8272, E8273, E8274, E8278, E8279, E8282, E8284, E8288, E8289, E8294, E8298, E8299,  
E8310, E8311, E8312, E8313, E8314, E8315, E8316, E8318, E8319, E8330, E8331, E8332,  
E8333, E8334, E8335, E8336, E8337, E8338, E8339, E8340, E8341, E8342, E8343, E8344,  
E8345, E8346, E8347, E8348, E8349, E8350, E8351, E8352, E8353, E8354, E8355, E8356,  
E8357, E8358, E8359, E8360, E8361, E8362, E8363, E8364, E8365, E8366, E8367, E8368,  
E8369, E8370, E8371, E8372, E8373, E8374, E8375, E8376, E8377, E8378, E8379, E8380,  
E8381, E8382, E8383, E8384, E8385, E8386, E8387, E8388, E8389, E8400, E8401, E8402,  
E8403, E8404, E8405, E8406, E8407, E8408, E8409, E8410, E8411, E8412, E8413, E8414,  
E8415, E8416, E8417, E8418, E8419, E8426, E8427, E8428, E8429, E8430, E8431, E8432,  
E8433, E8434, E8435, E8436, E8437, E8438, E8439, E8440, E8441, E8442, E8443, E8444,  
E8445, E8446, E8447, E8448, E8449, E8450, E8458, E8459, E9886

Fall

E8800, E8801, E8809, E8810, E8811, E882, E8830, E8831, E8832, E8839, E8840, E8841,  
E8842, E8843, E8844, E8845, E8846, E8849, E8850, E8851, E8852, E8853, E8854, E8859,

---

E8860, E8869, E8880, E8881, E8888, E8889, E9681, E9870, E9871, E9872, E9879

**Complications**

Decubitus Ulcer 707.0x

Deep venous thrombosis 453.4x

Pneumonia 003.22, 02.03, 02.04, 02.05, 02.12, 02.21, 03.91, 07.30, 07.37, 07.38, 07.39, 08.30, 481, 482.x, 483.x, 484.8, 485, 486, 510.0, 510.9, 513.0, 997.31, 997.32

Sepsis 003.1, 020.2, 022.3, 036.2, 036.42, 038.x, 040.82, 421.x, 422.92, 449, 790.7

Wound Infection 324.1, 682.2, 996.67, 998.5x

Osteomyelitis 730.00, 730.08, 730.20, 730.28, 730.98

Wound Dehiscence 998.3x, 998.83

Urinary Tract Infection 032.84, 590.1x, 590.2, 590.3, 590.8x, 590.9, 595.0, 595.4, 595.89, 599.0

Clostridium difficile colitis 008.45

Respiratory Failure 517.3, 518.5x, 518.81, 518.82, 518.84, 799.1, V461, V4611, V4612

Renal Failure 584.6, 584.7, 585.8, 584.9, 586

Prolonged Ventilation 967.2

Central Line Infection 999.31

Intraoperative Complication 995.4, 996.47, 996.49, 996.67, 996.78, 997.0x, 998.0, 998.1x, 998.2, 998.4

**Supplemental Table 1.** The ICD-9-CM diagnosis and procedure codes used for this study.

| Characteristics       | Matched Patients Admitted on a Weekday (N=3099) |      | Matched Patients admitted on the Weekend (N=3099) |      | Absolute Standardized difference, % |      |
|-----------------------|-------------------------------------------------|------|---------------------------------------------------|------|-------------------------------------|------|
|                       | N                                               | %    | N                                                 | %    |                                     |      |
| <b>Age</b>            | 18-25                                           | 487  | 15.71                                             | 468  | 15.10                               | 6.43 |
|                       | 26-30                                           | 201  | 6.49                                              | 221  | 7.13                                |      |
|                       | 31-35                                           | 209  | 6.74                                              | 193  | 6.23                                |      |
|                       | 36-40                                           | 206  | 6.65                                              | 213  | 6.87                                |      |
|                       | 41-45                                           | 280  | 9.04                                              | 263  | 8.49                                |      |
|                       | 46-50                                           | 320  | 10.33                                             | 323  | 10.42                               |      |
|                       | 51-55                                           | 276  | 8.91                                              | 280  | 9.04                                |      |
|                       | 56-60                                           | 217  | 7.00                                              | 230  | 7.42                                |      |
|                       | 61-65                                           | 175  | 5.65                                              | 171  | 5.52                                |      |
|                       | 66-70                                           | 167  | 5.39                                              | 167  | 5.39                                |      |
|                       | 71-75                                           | 127  | 4.10                                              | 147  | 4.74                                |      |
|                       | 76-80                                           | 140  | 4.52                                              | 146  | 4.71                                |      |
|                       | 81-85                                           | 163  | 5.26                                              | 145  | 4.68                                |      |
|                       | 86-90                                           | 81   | 2.61                                              | 75   | 2.42                                |      |
| >91                   | 50                                              | 1.61 | 57                                                | 1.84 |                                     |      |
| <b>Sex</b>            | Female                                          | 903  | 29.25                                             | 929  | 30.07                               | 1.80 |
| <b>TMPM (deciles)</b> | 1st                                             | 320  | 10.33                                             | 328  | 10.58                               | 6.87 |
|                       | 2 <sup>nd</sup>                                 | 366  | 11.81                                             | 342  | 11.04                               |      |
|                       | 3 <sup>rd</sup>                                 | 265  | 8.55                                              | 293  | 9.45                                |      |
|                       | 4 <sup>th</sup>                                 | 373  | 12.04                                             | 349  | 11.26                               |      |
|                       | 5 <sup>th</sup>                                 | 246  | 7.94                                              | 268  | 8.65                                |      |
|                       | 6 <sup>th</sup>                                 | 282  | 9.10                                              | 286  | 9.23                                |      |
|                       | 7 <sup>th</sup>                                 | 317  | 10.23                                             | 324  | 10.45                               |      |
|                       | 8 <sup>th</sup>                                 | 299  | 9.65                                              | 321  | 10.36                               |      |
|                       | 9 <sup>th</sup>                                 | 346  | 11.16                                             | 307  | 9.91                                |      |
|                       | 10 <sup>th</sup>                                | 285  | 9.20                                              | 281  | 9.07                                |      |
| <b>Race</b>           | Caucasian                                       | 1960 | 63.25                                             | 1928 | 62.21                               | 4.86 |
|                       | African-American                                | 429  | 13.84                                             | 422  | 13.62                               |      |
|                       | Hispanic                                        | 382  | 12.33                                             | 418  | 13.49                               |      |
|                       | Other                                           | 202  | 6.52                                              | 220  | 7.10                                |      |
|                       | Missing                                         | 126  | 4.07                                              | 111  | 3.58                                |      |
| <b>Payer</b>          | Medicare                                        | 757  | 24.43                                             | 765  | 24.69                               | 1.28 |
|                       | Medicaid                                        | 503  | 16.23                                             | 508  | 16.40                               |      |
|                       | Private Insurance                               | 1293 | 41.72                                             | 1273 | 41.09                               |      |

|                                                              |                                     |                                     |       |       |       |      |
|--------------------------------------------------------------|-------------------------------------|-------------------------------------|-------|-------|-------|------|
|                                                              | Other                               | 546                                 | 17.62 | 552   | 17.82 |      |
| <b>Hospital,<br/>Annual Number<br/>of SCI<br/>Admissions</b> | <10 per year                        | 1133                                | 36.56 | 1117  | 36.04 | 2.40 |
|                                                              | 10-19 per year                      | 765                                 | 24.69 | 764   | 24.65 |      |
|                                                              | 20-29 per year                      | 441                                 | 14.23 | 428   | 13.81 |      |
|                                                              | >30 per year                        | 760                                 | 24.52 | 790   | 25.49 |      |
|                                                              | <b>Patient<br/>Residence</b>        | Large Metro<br>Area (>1<br>million) | 2080  | 67.12 | 2057  | 66.4 |
|                                                              | Small Metro<br>Area (<1<br>million) | 811                                 | 26.17 | 837   | 27.02 |      |
|                                                              | Micropolitan<br>Area or Other       | 208                                 | 6.71  | 204   | 6.58  |      |
| <b>Comorbidities</b>                                         |                                     |                                     |       |       |       |      |
|                                                              | Alcohol                             | 574                                 | 18.52 | 549   | 17.72 | 2.09 |
|                                                              | Anemia,<br>Deficiency               | 473                                 | 15.26 | 461   | 14.88 | 1.08 |
|                                                              | Arthritis                           | 67                                  | 2.16  | 75    | 2.42  | 1.73 |
|                                                              | Anemia, Blood<br>Loss               | 29                                  | 0.94  | 26    | 0.84  | 1.03 |
|                                                              | Congestive<br>Heart Failure         | 137                                 | 4.42  | 134   | 4.32  | 0.47 |
|                                                              | Chronic Lung<br>Disease             | 344                                 | 11.1  | 347   | 11.2  | 0.31 |
|                                                              | Coagulopathy                        | 148                                 | 4.78  | 155   | 5.00  | 1.05 |
|                                                              | Depression                          | 295                                 | 9.52  | 307   | 9.91  | 1.31 |
|                                                              | Diabetes                            | 426                                 | 13.75 | 413   | 13.33 | 1.23 |
|                                                              | Drug use                            | 319                                 | 10.29 | 289   | 9.33  | 3.26 |
|                                                              | Hypertension                        | 1019                                | 32.88 | 1028  | 33.17 | 0.62 |
|                                                              | Hypothyroidism                      | 152                                 | 4.90  | 155   | 5.00  | 0.45 |
|                                                              | Liver Disease                       | 62                                  | 2.00  | 78    | 2.52  | 3.48 |
|                                                              | Electrolyte<br>Abnormality          | 753                                 | 24.30 | 759   | 24.49 | 0.45 |
|                                                              | Metastatic                          | 22                                  | 0.71  | 19    | 0.61  | 1.19 |

|                               |     |       |      |       |      |
|-------------------------------|-----|-------|------|-------|------|
| Cancer                        |     |       |      |       |      |
| Neurological Disease          | 240 | 7.74  | 242  | 7.81  | 0.24 |
| Obesity                       | 144 | 4.65  | 157  | 5.07  | 1.95 |
| Paralysis                     | 480 | 15.49 | 472  | 15.23 | 0.72 |
| Peripheral Vascular Disease   | 79  | 2.55  | 85   | 2.74  | 1.21 |
| Psychosis                     | 185 | 5.97  | 196  | 6.32  | 1.48 |
| Pulmonary Circulatory Disease | 63  | 2.03  | 55   | 1.77  | 1.89 |
| Renal Failure                 | 96  | 3.10  | 1.68 | 3.36  | 1.46 |
| Tumor, no metastases          | 27  | 0.87  | 25   | 0.81  | 0.71 |
| Valvular Heart Disease        | 95  | 3.07  | 99   | 3.19  | 0.74 |
| Weight Loss                   | 222 | 7.16  | 226  | 7.29  | 0.50 |

**Supplemental Table 2. Comparison of Propensity Score Matched patients admitted on weekdays and weekends.** All characteristics used for match are reported. All matched characteristics had a standardized difference <10%.
